# Supplementary material for: CD44–fibrinogen binding promotes bleeding in acute promyelocytic leukemia by in situ fibrin(ogen) deposition
Source: PubMed Central journal article supplement — Blood Adv. 2022 May 6;6(15):4617–33. doi: 10.1182/bloodadvances.2022006980 (PMC9636334; doi:10.1182/bloodadvances.2022006980), 2022-05-06

## Supplementary results

### Supplementary Figure S1

**The viability of leukemia cells treated with Fbg.** Trypan Blue Dye Exclusion Method was used to evaluate cell activity. Cell suspension was mixed with trypan blue dye (9:1), three minutes later the number of living cells and dead cells were calculated.

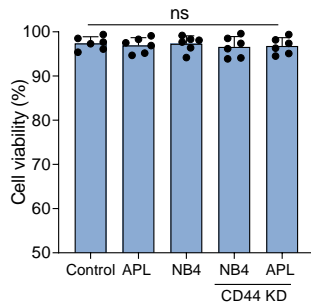

### Supplementary Figure S2

Correlation between D-dimer and fibrinogen (Fbg) levels and the level of CD44.

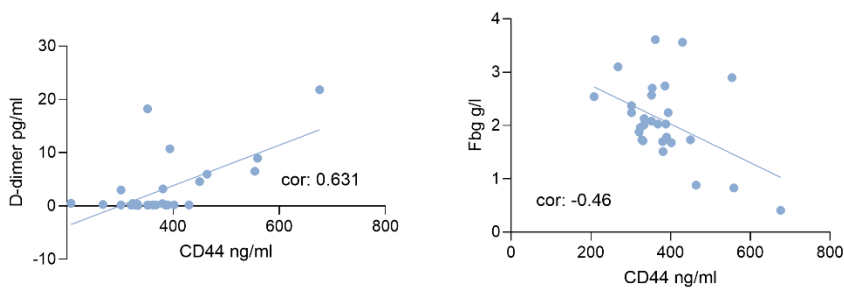

### Supplementary Figure S3

NB4/APL cells were treated with BKM (1  $\mu$ m), the cell viability and the proportion of apoptotic cells were measured. \*P < 0.05 vs the data in APL group at 12 h. #P < 0.05 vs the data in NB4 group at 12 h.

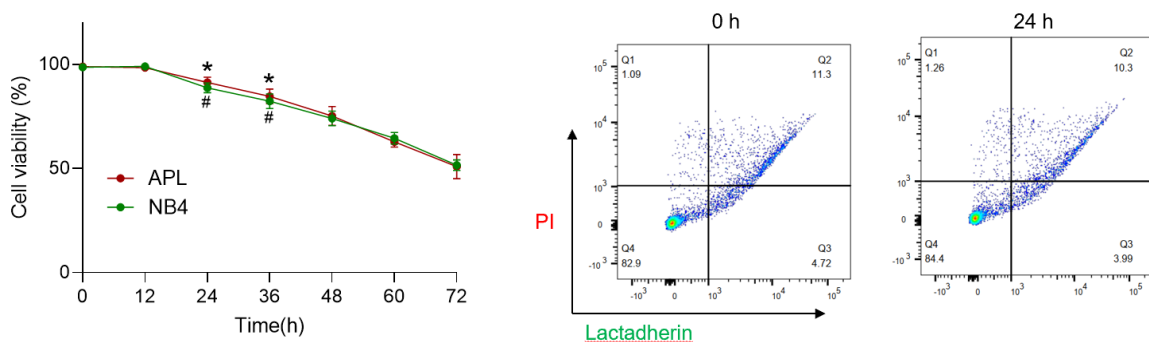

### Supplementary Figure S4

The relative protein level of AKT and m-Tor calculated by Image J. ns: no significant.

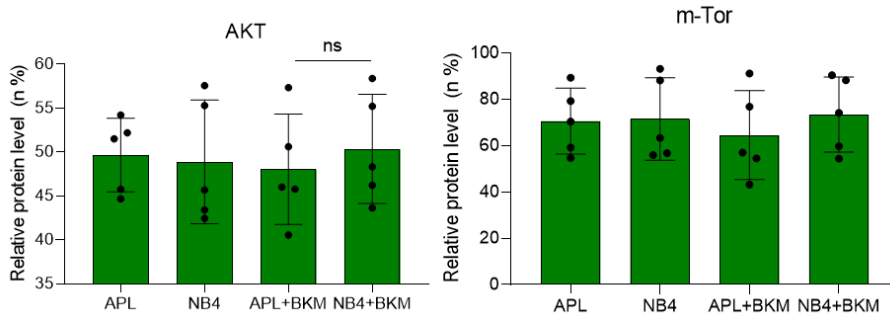

### Supplementary Figure S5

NB4/APL cells were treated with/without BKM, and the time to peak was measured. \*\*P<0.01.

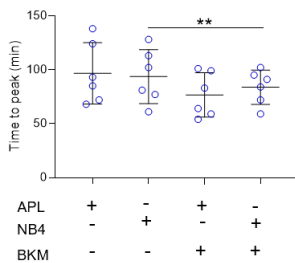

### Supplementary Figure S6

APL cells were pretreated with PI3K agoist-740YP and then cultured with ATO. Western blotting was used to measure the expression of P-AKT and AKT. \*\*P<0.01.

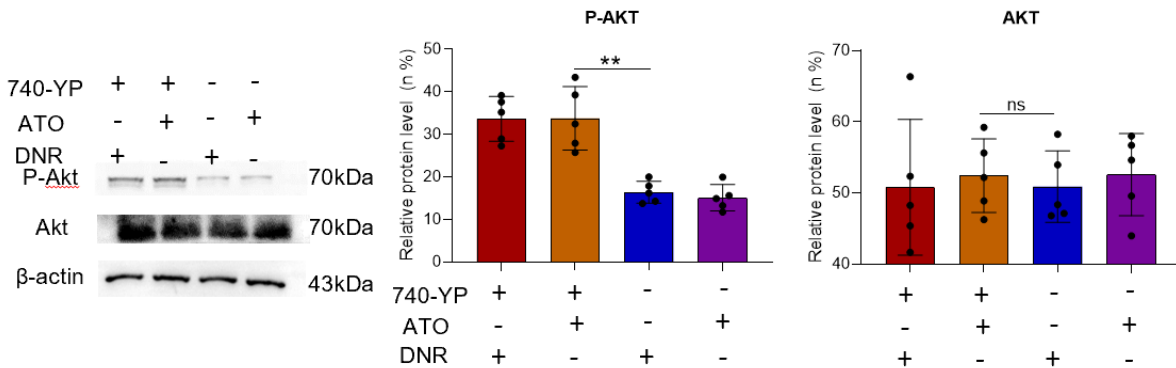

### Supplementary Figure S7

Fibrinogen free of von Willebrand factor, plasminogen, and fibronectin was diluted to 1 mg/mL with NaCl at 37°C. The glass slides were incubated overnight at 4°C. For the cell adhesion assay, NB4 cells were loaded in 24-well tissue culture plates coated with fibrinogen/hyaluronan at a concentration of 1×10<sup>6</sup> cells per well in RPMI 1640 medium. Twenty-four hours later, the plates were gently washed twice with PBS. Attached cells were observed by an inverted microscope.

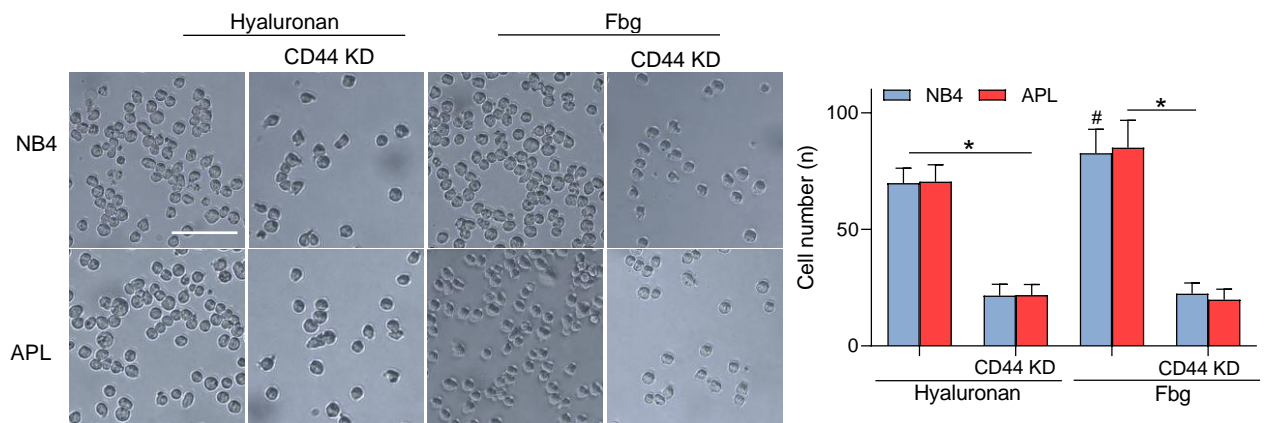

### Supplementary Figure S8

Representative images of gross development at 7 and 21 days after excision injury. Longitudinal wounds (1 cm<sup>2</sup>) were created in the dorsum of the animal, and the wounds were left unsutured. NB4 cell-derived CD44 deficiency elevated wound stability and shortened the time for tissue repair, thereby contributing to wound healing.

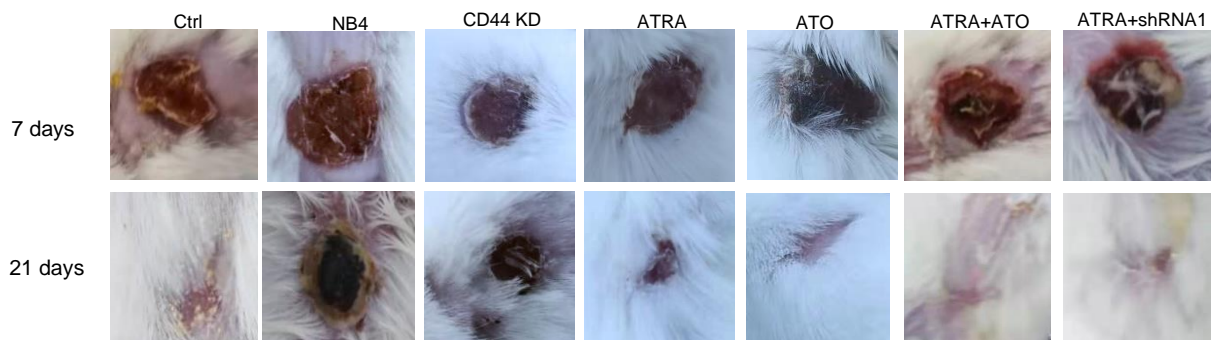

Supplement: mmc1.pdf [file mmc1.pdf]
